# Supplementary material
Source: publisher figshare collection journal article supplement (https://tandf.figshare.com/ndownloader/files/16433612)
Supplement: Supplementary file 1 [file 16433612]

**Supplement material – Interview guide**

**Background questions**

- **Could you tell us about your current asthma?**
  - Do you have any examples of when you are affected?
- Could you tell us about how you treat your asthma?
- Could you tell us what your contact with health care due to your asthma looks like?
- Do you have any examples of your needs for health care?
- Could you talk a bit about continuity and regularity in health care?
- **Could you tell us what you remember about your asthma from when you were younger?**
  - Do you have any examples of when you were affected?
- Could you tell us about how you treated your asthma?
- Could you tell us what your contact with health care due to your asthma looked like?
- Do you have any examples of what your needs for health care were?
- Could you talk a bit about continuity and regularity in health care then?
- **Could you tell us whether you perceive any differences between now and then?**

**Main questions**

1. **Could you tell us if you have experienced a transition or what things were like for you at around 18 years of age?**

- Could you describe how you experienced the transition?
- Could you give examples of whether you were prepared for the transition or not?

1. **Could you describe if you had any expectations of adult care?**

- Could you tell us how you experienced health care at around 18 years of age?
- Could you tell us what information you would have wanted before the transition?
- Could you give examples of how you would have wanted the transition to be?
- At what age do you think the transition would be appropriate and can you explain why?

1. **Could you describe your needs after the transition to adult care?**

- Could you tell us if your needs are fulfilled in adult care?
- Could you give examples of what the transition has meant to you?
- Could you discuss your views on continuity and regularity in contact with health care?
- Could you tell us how you wish your contact with health care would be?

1. **Could you tell us a bit about the distribution of responsibilities when transitioning from child to adult care?**

- Do you have any thoughts on what health care can do to ensure patients get a successful transition from child to adult care?
- How do you reason about what is the responsibility of health care and the individual, respectively, in the transition?
- Do you have any thoughts about the fact that the visits in adult care entail a cost?

**Is there anything else that you think is important to address that we have not mentioned today?**
